# Supplementary material
Source: PubMed Central journal article supplement (PMC6866742)
Supplement: HBM-38-2734-s001.pdf [file HBM-38-2734-s001.pdf]

## 1 **Supplementary Materials**

### 2 **The effect of sample size on the predictability and reliability of CCM**

3 The applicability of CCM can be affected by the sample size of data, as the predictability of causal  
4 interactions increases with the increasing sample size (Sugihara, et al., 2012). Here, we performed two  
5 analyses to examine the sample size effect on the predictability and reliability of CCM in fMRI data.

6

7 *Predictability of CCM in simulated data.* First, we investigated the sample size effect on the  
8 predictability of CCM based on the simulated data. We simulated a nonlinear dynamical system  
9 containing two coupled difference equations that exhibit chaotic behaviors, as demonstrated by  
10 Sugihara, et al. (2012):

$$11 \quad X(t + 1) = X(t)[r_x - r_x X(t) - \beta_{x,y} Y(t)]$$

$$12 \quad Y(t + 1) = Y(t)[r_y - r_y X(t) - \beta_{y,x} X(t)]$$

13 where  $r_x = 3.8$ ,  $r_y = 3.5$ ,  $\beta_{x,y} = 0.002$ , and  $\beta_{y,x} = 0.1$ . The initial states of  $X(0)$  and  $Y(0)$  were randomly  
14 chosen from the standard uniform distribution with the interval (0,1). In this system, variable  $X$  exerted  
15 the causal influence on variable  $Y$ , while considerably weak vice versa. Using this model, we simulated  
16 1200 time points raw signals of both  $X$  and  $Y$  and simply assumed that the simulated time series  
17 represented the underlying neural activities of two brain regions. Then, the Balloon–Windkessel  
18 hemodynamic model was applied on the raw signals to generate corresponding BOLD signals (Buxton,  
19 et al., 1998; Friston, et al., 2000). Parameters in the model (e.g., the signal decay, transit time, echo time,  
20 etc.) were assigned as default values in the fMRI Simulation Toolbox (SimTB) (Erhardt, et al., 2012).  
21 Finally, the first 200 time points of the resultant time series were discarded to enable variables achieve  
22 stable dynamics. The causality between  $X$  and  $Y$  was calculated by implementing CCM on the raw time  
23 series and simulated BOLD signals, separately. The length of time series was selected as a range of 50-

24 1000 time points with steps of 50 to investigate the sample size effect on the predictability. The whole  
25 simulation and estimation process were repeated for 100 times.

26 For both types of time series (e.g., the raw time series and simulated BOLD signals), we found that  
27 the average causality coefficients of  $X$  to  $Y$  were much larger than  $Y$  to  $X$  (around zero), indicating the  
28 credible predictability for the causal direction of CCM. Meanwhile, the causality coefficients of  $X$  to  $Y$   
29 were the higher for the raw time series than the simulated BOLD signals, suggesting that the  
30 hemodynamic response can affect the predictability of CCM. Moreover, we found that the causality  
31 coefficient tended to remain stably above 0.8 for raw time series and 0.6 for simulated BOLD signals  
32 when sample size is larger than 200, suggesting a reliable predictability of CCM in detecting causal  
33 relationship with sample size larger than 200 (Fig. S5).

34

35 *Reliability of CCM in real data.* To estimate the sample size effect on the reliability of CCM, we  
36 constructed the directed functional networks with different signal length for each individual and  
37 calculated the intra-class correlation coefficient (*ICC*) for each connection. Briefly, based on the  
38 preprocessed data, we constructed the directed functional networks with the first 100, 150, 200, 250 and  
39 300 time points for each individual, respectively. Then, the *ICC* for each connection was calculated  
40 between each network constructed with cut time series and the network constructed with the full time  
41 series length (i.e., 365), using the following formula (Shrout and Fleiss, 1979):

$$42 \quad ICC = (\sigma_{bs}^2 - \sigma_{ws}^2) / [\sigma_{bs}^2 + (m - 1)\sigma_{ws}^2]$$

43 where  $\sigma_{bs}$  is the between-subject variance,  $\sigma_{ws}$  is the within subject variance, and  $m$  is the number of  
44 repeated measures. Thus, we obtained an *ICC* map for each time point segment, which represents the  
45 reliability to the network constructed with full time series length. Notably, *ICC* is a normalized measure  
46 which has a maximum of 1. The *ICC* values were commonly categorized into five intervals (Landis and

47 Koch, 1977):  $0 < ICC \leq 0.2$  (slight),  $0.2 < ICC \leq 0.4$  (fair),  $0.4 < ICC \leq 0.6$  (moderate),  $0.6 < ICC \leq 0.8$   
48 (substantial), and  $0.8 < ICC \leq 1.0$  (almost perfect).

49 In general, the reliability of CCM increases with increasing sample size and the average ICCs  
50 reached 0.457, 0.596, 0.730, 0.827 and 0.910 for 100, 150, 200, 250 and 300 time points, respectively.  
51 These results suggest the moderate to perfect reliability of CCM in constructing directed functional  
52 networks from real BOLD data, even with a sample size less than 300. (Figure S6).

53

#### 54 **The effect of dimension $E$ in CCM on network construction**

55 In our main analysis, we set the reconstructing dimension  $E = 3$  according to analyses on the ratio of  
56 false neighbors (Kennel, et al., 1992). Here, we further investigated whether the selection of  
57 reconstructing dimension  $E$  on CCM could affect the construction of the directed functional brain  
58 networks. We chose different  $E$  levels, e.g.,  $E = 3, 5, 7, 9$  and  $11$ , and redid the causality coefficients  
59 estimation between every two nodes by using CCM, separately. Accordingly, a  $160 \times 160$  causality  
60 coefficients matrix was obtained at each level of  $E$  for each subject. Next, we calculated the  $ICC$  scores  
61 across different  $E$  levels for each connection within the network to assess the reliability of directed  
62 functional network construction under different  $E$  levels.

63 The result showed that 30.7% of the connections exhibited an excellent reliability of  $ICC > 0.8$ , and  
64 96.9% connections had at least moderate reliability of  $ICC > 0.4$ . These results suggested that the  
65 construction of the directed functional network retained stable among different selection of the  
66 parameter  $E$  in CCM.

67

#### 68 **Effect of network construction with random projection method**

69 The use of the standard delay-coordinate in CCM might decrease the predictability when estimating  
70 causal relationship in a highly heterogeneous system with high dimensionality, and a plenty of data  
71 samples are thus required to maintain the high predictability in CCM (Tajima, et al., 2015). To reduce  
72 the dimensionality of data, a random projection method was proposed by Tajima, et al. (2015). Here, we  
73 employed this method in network construction procedures and re-performed the analyses to examine  
74 whether our main results were sensitive to the mapping algorithm. In detail, when constructing the  
75 phase-shifted space, we projected the delay vector (i.e., the reconstructed variable),  $\underline{x}(t) = [x(t-T), x(t-$   
76  $2T), \dots, x(t-(E-1)T)]$ , to a randomized coordinate space by multiplying a square random matrix,  $\mathbf{R}$ , from  
77 the left of  $\underline{x}(t)$  to obtain a transformed vector:  $\underline{x}_d(t) = \mathbf{R}\underline{x}(t)$ . The random matrix was generated from the  
78 Gaussian distribution centered at zero with the standard deviation of one. The randomized vector  $\underline{x}_d(t)$ ,  
79 instead of  $\underline{x}(t)$ , was used for following steps of causality estimation. Then, we performed the same  
80 analysis protocol as those in the main text.

81 We found the resultant causality coefficient matrix was highly similar to the one constructed by the  
82 standard CCM algorithm, indicated by a spatial correlation of  $r = 0.98$  between the group-level matrices.  
83 The network also exhibited a small-world architecture, with  $\sigma = 1.64$ ,  $\gamma = 1.71$  and  $\lambda = 1.04$ . Moreover,  
84 the network demonstrated highly similar motif patterns with our main findings that there were 1397  
85 unidirected motifs and 1425 reciprocal motifs, three-node motif ID = 4, 6, 9, 12 and 13 were identified  
86 with significantly great frequencies ( $Z > 1.96$ ), and the three-node motif profiles were almost same with  
87 the standard one ( $r = 0.997$ ). Together, these results suggest our findings are robust to the dimensionality  
88 reduction method.

89

90 **Hubs in directed functional brain networks constructed by Granger causality analysis**

91 To compare the hub set between networks constructed using CCM and Granger Causality (GC), we used  
92 the GC method to construct the directed functional brain networks and identified their hubs. The code of  
93 GC was downloaded from [https://www.mathworks.com/matlabcentral/fileexchange/25467-granger-](https://www.mathworks.com/matlabcentral/fileexchange/25467-granger-causality-test)  
94 [causality-test](https://www.mathworks.com/matlabcentral/fileexchange/25467-granger-causality-test), which is based on the original GC definition (Granger, 1969), and uses Bayesian  
95 information criterion to determine the lag length. For each subject, the F-statistic value was calculated  
96 by performing GC test between every two nodes. Consequently, a 160×160 F-statistic matrix was  
97 obtained for each subject and the group-level GC network was yielded by averaging all individual  
98 matrices. The same density level of 18.5% to the CCM network was chosen as the threshold to binarize  
99 the group-level GC matrix. Those nodes with total-degree values of at least one standard deviation (SD)  
100 greater than the average total-degree of the network were identified as brain hubs.

101 We identified 27 hubs from the GC-derived directed network according to the total-degree, 13  
102 (48.15%) of which were overlapped with those in the CCM network. These overlapped hubs were  
103 mainly located in the medial prefrontal, visual and lateral parietal cortices (Fig. S8 and Table S4).

104

105

106 **Supplemental Figures**

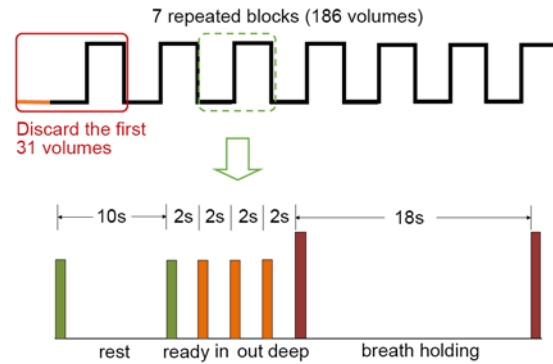

107

108 **Figure S1.** Brief description of the BH task design. During the T-fMRI scan, participants were required  
 109 to perform a block-designed BH task with 7 repeated blocks (top). Within each block of 36 s,  
 110 participants were instructed to keep rest for the first 10 s, then to get ready, breath in, breath out, deep  
 111 breath for 2 s, separately, and finally to hold their breath for 18 s (bottom). During the data  
 112 preprocessing, the 31 volumes before the 2<sup>nd</sup> block were discarded in analysis due to MRI signal  
 113 equilibrium and subjects' adaptation to the task.

114

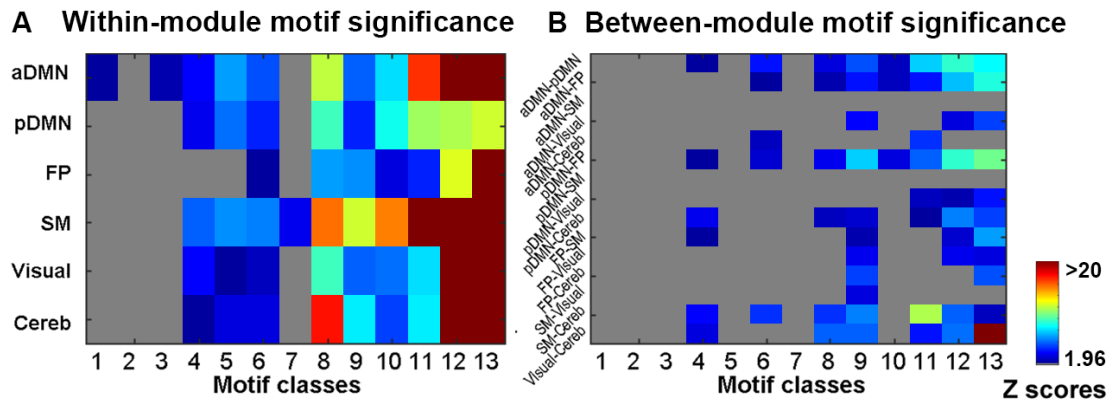

115

116

117 **Figure S2.** Within-/between-module three-node motif significance. Z scores were obtained by  
 118 comparing motif count in the brain network to 100 stringent random networks conserving same number

119 of nodes, in-/out-degree, and number of unidirectional and reciprocal edges. Motif classes showing  $Z >$   
120 1.96 were defined as significant.

121

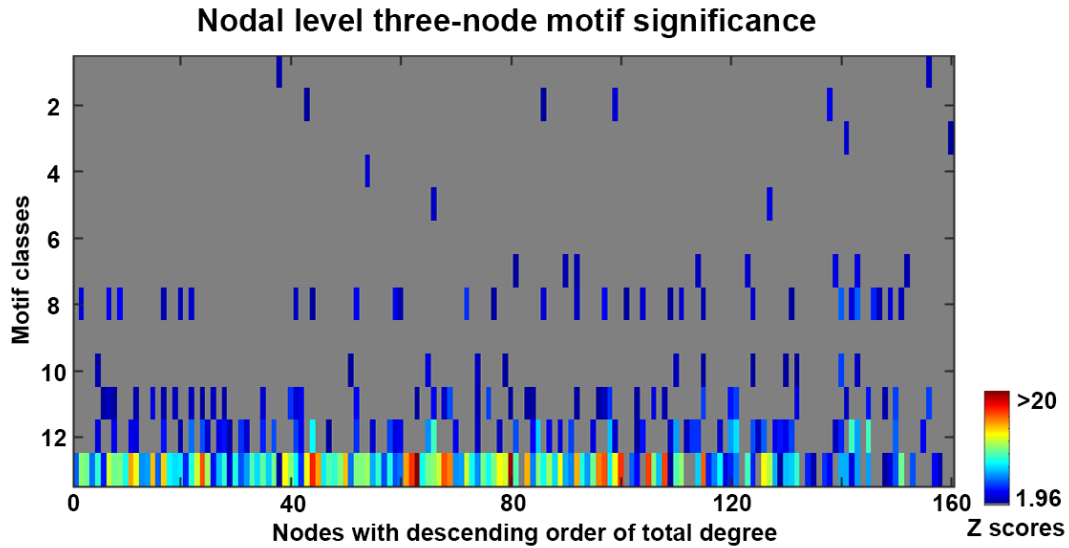

122

123 **Figure S3.** Nodal-level three-node motif significance. Z scores were obtained by comparing motif count  
124 in the brain network to 100 stringent random networks conserving same number of nodes, in-/out-  
125 degree, and unidirectional and reciprocal edges. Motif classes showing  $Z > 1.96$  were defined as  
126 significant.

127

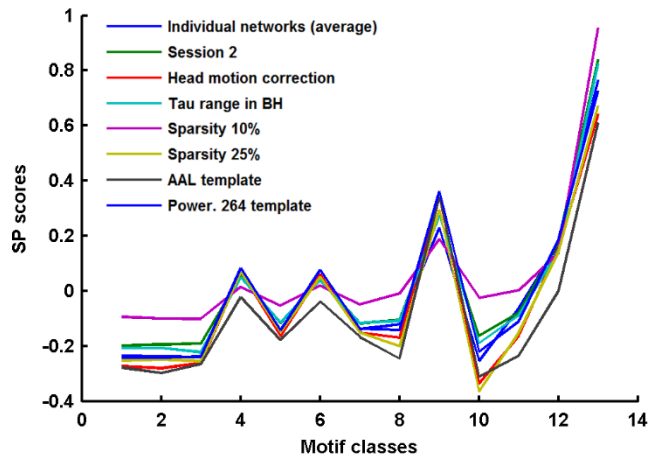

128

129 **Figure S4.** The significant profile (SP) curves of the three-node motifs in different validation analyses.

130 The profiles of SP curves were consistent across different validation cases.

131

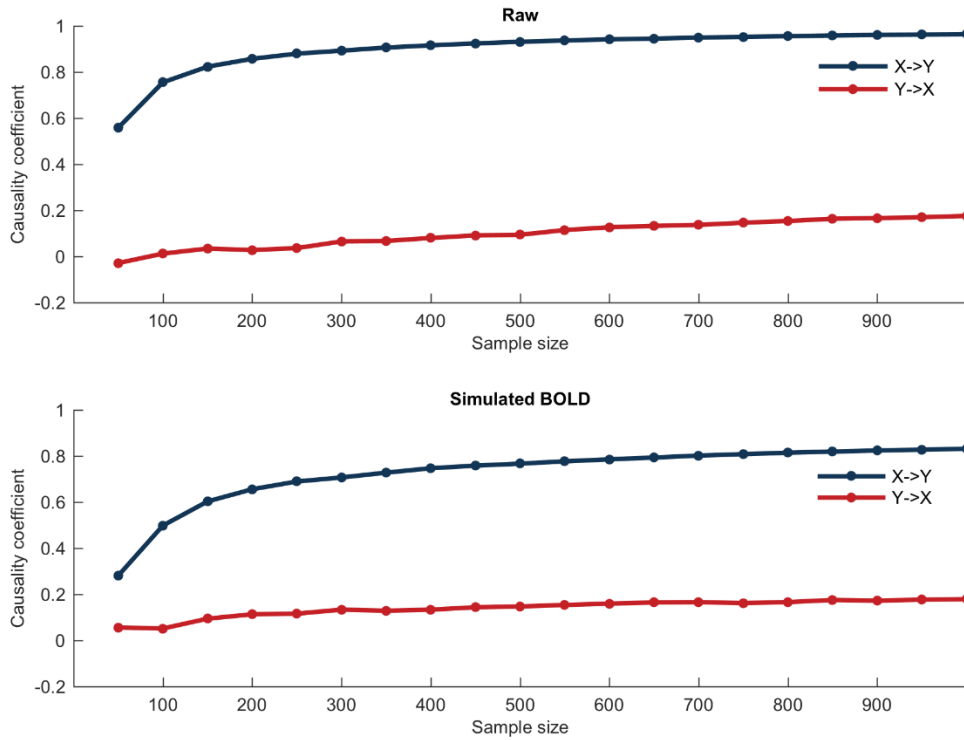

132

133 **Figure S5.** The relation between CCM predictability and data sample size. The simulation model  
134 contains two variables  $X$  and  $Y$ , where  $X$  causally affect  $Y$ , but not vice versa. The causality coefficients  
135 for  $X$  to  $Y$  increase with the increasing sample size, but reach a relative stability after sample size  $\geq 200$ .  
136 The causality was estimated for the raw time series of the model (top panel) and the simulated BOLD  
137 signals (bottom panel). Blue line denotes the estimated average causality coefficient from  $X$  to  $Y$ . Red  
138 line denotes the estimated average causality coefficient from  $Y$  to  $X$ .

139



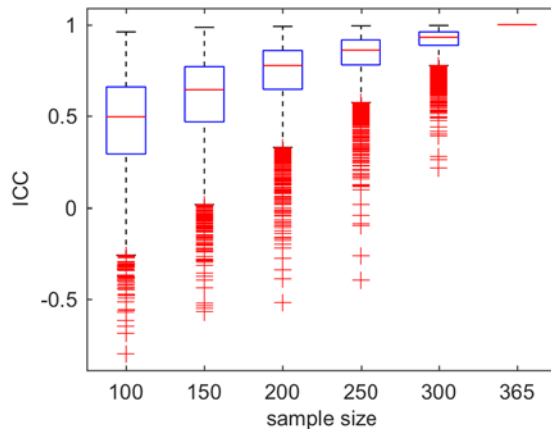

140

141 **Figure S6.** Edge-wise ICC between matrices at sample size 365 and lower sample size levels. The  
 142 central mark of each box is the median, the edges of the box are the 25th and 75th percentiles, the  
 143 whiskers extend to the most extreme data points not considered outliers.

144

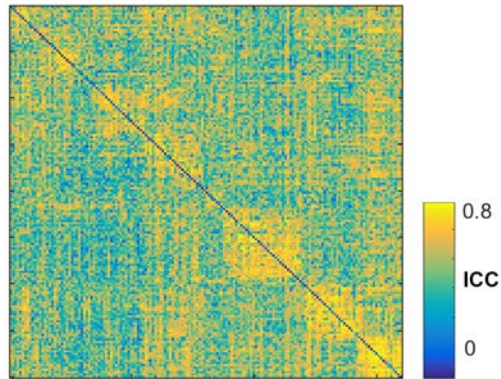

145

146 **Figure S7.** Edge-wise *ICC* across different E levels. 30.7% connections showed  $ICC > 0.8$ , and 96.9%  
 147 connections exhibited  $ICC > 0.4$ .

148

149

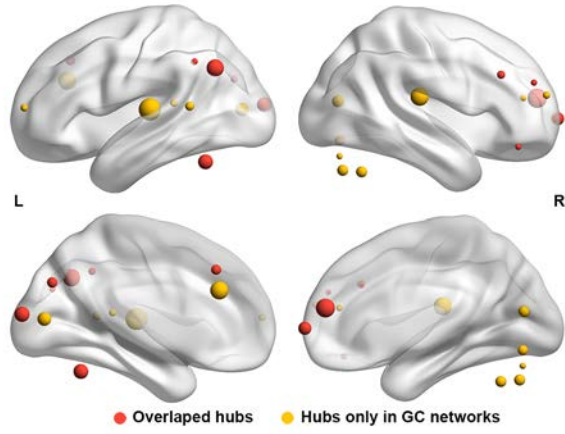

150

151 **Figure S8.** Total-degree Hubs in the GC derived functional brain network. Red: overlapping with the

152 CCM-derived results in the main text. Yellow: non-overlapping hubs only identified in GC-derived

153 network.

154 **Supplemental Tables**155 **Table S1.** Demographic information of the participants

| Subject ID | Gender | Age | Whether included in current study (if not, give reasons) |
|------------|--------|-----|----------------------------------------------------------|
| 2475376    | Male   | 21  | included                                                 |
| 9630905    | Female | 36  | included                                                 |
| 2799329    | Male   | 30  | included                                                 |
| 8735778    | Female | 31  | included                                                 |
| 3808535    | Male   | 25  | included                                                 |
| 7055197    | Female | 22  | included                                                 |
| 1427581    | Female | 27  | included                                                 |
| 3201815    | Male   | 48  | included                                                 |
| 4176156    | Male   | 46  | included                                                 |
| 3315657    | Male   | 19  | included                                                 |
| 2842950    | Male   | 27  | excluded (unknown volumes in T-fMRI data)                |
| 21001      | Male   | 57  | excluded (brain atrophy)                                 |
| 3795193    | Male   | 57  | excluded (excessive head motion)                         |
| 21006      | Male   | 32  | excluded (no diagnostic information)                     |
| 21024      | Male   | 22  | excluded (no diagnostic information)                     |
| 21018      | Male   | 36  | excluded (no diagnostic information)                     |
| 21002      | Male   | 52  | excluded (no diagnostic information)                     |
| 3893245    | Male   | 38  | excluded (psychiatric disease)                           |
| 3313349    | Female | 22  | excluded (psychiatric disease)                           |
| 1961098    | Female | 21  | excluded (psychiatric disease)                           |
| 8574662    | Male   | 42  | excluded (psychiatric disease)                           |
| 1793622    | Male   | 60  | excluded (psychiatric disease)                           |
| 4288245    | Male   | 22  | excluded (psychiatric disease)                           |
| 6471972    | Male   | 32  | excluded (psychiatric disease)                           |

156

**Table S2.** Hub nodes of the directed functional brain network

| Hub regions                     | MNI coordinates |     |     | IN degree | OUT degree | TOTAL degree | (IN-OUT) / TOTAL |
|---------------------------------|-----------------|-----|-----|-----------|------------|--------------|------------------|
| Angular gyrus                   | -48             | -63 | 35  | 64        | 54         | 118          | 0.08             |
| Ventromedial prefrontal cortex  | 9               | 51  | 16  | 55        | 62         | 117          | -0.06            |
| Dorsolateral prefrontal cortex  | 46              | 28  | 31  | 58        | 56         | 114          | 0.02             |
| Temporal                        | 46              | -62 | 5   | 71        | 42         | 113          | 0.26             |
| Ventrolateral prefrontal cortex | 46              | 39  | -15 | 54        | 58         | 112          | -0.04            |
| Ventromedial prefrontal cortex  | 6               | 64  | 3   | 65        | 46         | 111          | 0.17             |
| Anterior cingulate cortex       | -1              | 28  | 40  | 50        | 58         | 108          | -0.07            |
| Medial prefrontal cortex        | 0               | 51  | 32  | 56        | 49         | 105          | 0.07             |
| Occipital                       | -29             | -75 | 28  | 51        | 51         | 102          | 0                |
| Occipital                       | -16             | -76 | 33  | 45        | 57         | 102          | -0.12            |
| Inferior parietal sulcus        | -36             | -69 | 40  | 57        | 43         | 100          | 0.14             |
| Inferior parietal lobe          | -48             | -47 | 49  | 46        | 54         | 100          | -0.08            |
| Supplementary motor area        | 0               | -1  | 52  | 49        | 51         | 100          | -0.02            |
| Temporoparietal junction        | -52             | -63 | 15  | 56        | 41         | 97           | 0.15             |
| Anterior Prefrontal cortex      | 27              | 49  | 26  | 47        | 49         | 96           | -0.02            |
| Occipital                       | -2              | -75 | 32  | 49        | 44         | 93           | 0.05             |
| Dorsolateral prefrontal cortex  | 40              | 36  | 29  | 47        | 46         | 93           | 0.01             |
| Anterior insula                 | 38              | 21  | -1  | 48        | 45         | 93           | 0.03             |
| Post cingulate                  | 1               | -26 | 31  | 44        | 48         | 92           | -0.04            |
| Post occipital                  | -4              | -94 | 12  | 50        | 41         | 91           | 0.10             |
| Lateral cerebellum              | -34             | -57 | -24 | 51        | 40         | 91           | 0.12             |
| Ventral prefrontal cortex       | 42              | 48  | -3  | 45        | 45         | 90           | 0                |
| Parietal                        | -47             | -18 | 50  | 45        | 45         | 90           | 0                |
| Dorsolateral prefrontal cortex  | -44             | 27  | 33  | 49        | 38         | 87           | 0.13             |
| Superior frontal                | -16             | 29  | 54  | 35        | 51         | 86           | -0.19            |
| Inferior cerebellum             | -21             | -79 | -33 | 47        | 39         | 86           | 0.09             |
| Inferior parietal lobe          | -53             | -50 | 39  | 38        | 47         | 85           | -0.11            |

159 **Table S3.** Summary of the small-world architecture and whole-brain motif patterns in validations

| Validation cases            | Density              | Small-worldness    |                    |                    | two-node motifs                               | three-node motifs                |                                          |
|-----------------------------|----------------------|--------------------|--------------------|--------------------|-----------------------------------------------|----------------------------------|------------------------------------------|
|                             |                      | $\gamma$           | $\lambda$          | $\sigma$           | unidirectional /<br>reciprocal<br>motif count | $Z_{rand}$<br>(reciprocal motif) | significant motifs'<br>ID ( $Z > 1.96$ ) |
| <b>In the text</b>          | <b>18.5%</b>         | <b>1.61</b>        | <b>1.03</b>        | <b>1.56</b>        | <b>1573 / 1568</b>                            | <b>61.8</b>                      | <b>4, 6, 9, 12, 13</b>                   |
| Individual networks         | 18.5%<br>$\pm 4.0\%$ | 1.28<br>$\pm 0.13$ | 1.02<br>$\pm 0.02$ | 1.25<br>$\pm 0.13$ | 1891 $\pm$ 362/<br>1409 $\pm$ 360             | 44.3<br>$\pm 3.54$               | 4, 6, 9, 12, 13                          |
| Scanning session            | 17.8%                | 1.58               | 1.03               | 1.53               | 1493 / 1514                                   | 61.8                             | 4, 6, 9, 12, 13                          |
| Head motion                 | 24.6%                | 1.30               | 1.01               | 1.29               | 2049 / 2099                                   | 58.7                             | 4, 6, 9, 12, 13                          |
| Tau range in BH             | 18.1%                | 1.58               | 1.03               | 1.53               | 1484 / 1560                                   | 56.0                             | 4, 6, 9, 12, 13                          |
| Sparsity (0.10)             | 10.0%                | 2.81               | 1.12               | 2.5                | 702 / 921                                     | 63.2                             | 4, 6, 9, 12, 13                          |
| Sparsity (0.25)             | 25.0%                | 1.3                | 1.01               | 1.28               | 2094 / 2133                                   | 69.5                             | 4, 6, 9, 12, 13                          |
| Parcellation<br>(AAL90)     | 34.9%                | 1.17               | 1.02               | 1.14               | 595 / 1098                                    | 38.3                             | 9, 13                                    |
| Parcellation<br>(Power 264) | 15.9%                | 1.34               | 1.02               | 1.31               | 4085 / 3468                                   | 85.9                             | 4, 6, 9, 12, 13                          |

160

**Table S4.** Hub nodes of the directed functional brain network derived by Granger causality analysis

| Hub regions                     | MNI coordinates |     |     | IN degree | OUT degree | TOTAL degree | (IN-OUT) / TOTAL | Overlap with CCM network |
|---------------------------------|-----------------|-----|-----|-----------|------------|--------------|------------------|--------------------------|
| Temporal                        | -54             | -22 | 9   | 70        | 57         | 127          | 0.10             | NO                       |
| Ventromedial prefrontal cortex  | 9               | 51  | 16  | 57        | 63         | 120          | -0.05            | YES                      |
| Post insula                     | 42              | -24 | 17  | 78        | 39         | 117          | 0.33             | NO                       |
| Anterior cingulate cortex       | -2              | 30  | 27  | 55        | 61         | 116          | -0.05            | NO                       |
| Angular gyrus                   | -48             | -63 | 35  | 67        | 47         | 114          | 0.18             | YES                      |
| Medial prefrontal cortex        | 0               | 51  | 32  | 87        | 26         | 113          | 0.54             | YES                      |
| Post occipital                  | -4              | -94 | 12  | 24        | 84         | 108          | -0.56            | YES                      |
| Lateral cerebellum              | -34             | -57 | -24 | 30        | 77         | 107          | -0.44            | YES                      |
| Post occipital                  | -5              | -80 | 9   | 46        | 58         | 104          | -0.12            | NO                       |
| Ventromedial prefrontal cortex  | 6               | 64  | 3   | 71        | 32         | 103          | 0.38             | YES                      |
| Occipital                       | 9               | -76 | 14  | 50        | 50         | 100          | 0                | NO                       |
| Inferior cerebellum             | 32              | -61 | -31 | 55        | 42         | 97           | 0.13             | NO                       |
| Inferior cerebellum             | 33              | -73 | -30 | 54        | 43         | 97           | 0.11             | NO                       |
| Occipital                       | -2              | -75 | 32  | 57        | 38         | 95           | 0.20             | YES                      |
| Medial cerebellum               | 5               | -75 | -11 | 21        | 74         | 95           | -0.56            | NO                       |
| Anterior cingulate cortex       | -1              | 28  | 40  | 59        | 35         | 94           | 0.26             | YES                      |
| Temporal                        | -59             | -47 | 11  | 76        | 15         | 91           | 0.67             | NO                       |
| Medial prefrontal cortex        | 0               | 15  | 45  | 33        | 57         | 90           | -0.27            | NO                       |
| Dorsolateral prefrontal cortex  | 46              | 28  | 31  | 52        | 37         | 89           | 0.17             | YES                      |
| Anterior Prefrontal cortex      | 29              | 57  | 18  | 36        | 51         | 87           | -0.17            | NO                       |
| Anterior Prefrontal cortex      | -29             | 57  | 10  | 60        | 27         | 87           | 0.38             | NO                       |
| Temporal                        | -53             | -37 | 13  | 57        | 30         | 87           | 0.31             | NO                       |
| Inferior parietal lobe          | -53             | -50 | 39  | 56        | 30         | 86           | 0.30             | YES                      |
| Ventrolateral prefrontal cortex | 39              | 42  | 16  | 63        | 22         | 85           | 0.48             | NO                       |
| Occipital                       | -29             | -75 | 28  | 34        | 51         | 85           | -0.20            | YES                      |
| Ventrolateral prefrontal cortex | 46              | 39  | -15 | 43        | 41         | 84           | 0.02             | YES                      |
| Anterior Prefrontal cortex      | 27              | 49  | 26  | 30        | 54         | 84           | -0.29            | YES                      |
| Medial cerebellum               | 14              | -75 | -21 | 44        | 40         | 84           | 0.05             | NO                       |

163 **References**

- 164 Buxton, R.B., Wong, E.C., Frank, L.R. (1998) Dynamics of blood flow and oxygenation changes  
165 during brain activation: the balloon model. *Magn Reson Med*, 39:855-64.
- 166 Erhardt, E.B., Allen, E.A., Wei, Y., Eichele, T., Calhoun, V.D. (2012) SimTB, a simulation toolbox for  
167 fMRI data under a model of spatiotemporal separability. *Neuroimage*, 59:4160-7.
- 168 Friston, K.J., Mechelli, A., Turner, R., Price, C.J. (2000) Nonlinear responses in fMRI: the Balloon  
169 model, Volterra kernels, and other hemodynamics. *Neuroimage*, 12:466-77.
- 170 Granger, C.W.J. (1969) Investigating Causal Relations by Econometric Models and Cross-spectral  
171 Methods. *Econometrica*, 37:424-438.
- 172 Kennel, M.B., Brown, R., Abarbanel, H.D.I. (1992) Determining Embedding Dimension for Phase-  
173 Space Reconstruction Using a Geometrical Construction. *Phys Rev A*, 45:3403-3411.
- 174 Landis, J.R., Koch, G.G. (1977) The measurement of observer agreement for categorical data.  
175 *Biometrics*, 33:159-74.
- 176 Shrout, P.E., Fleiss, J.L. (1979) Intraclass correlations: uses in assessing rater reliability. *Psychol*  
177 *Bull*, 86:420-8.
- 178 Sugihara, G., May, R., Ye, H., Hsieh, C.H., Deyle, E., Fogarty, M., Munch, S. (2012) Detecting causality  
179 in complex ecosystems. *Science*, 338:496-500.
- 180 Tajima, S., Yanagawa, T., Fujii, N., Toyozumi, T. (2015) Untangling Brain-Wide Dynamics in  
181 Consciousness by Cross-Embedding. *PLoS Comput Biol*, 11:e1004537.

182
